# Supplementary material for: MoO2 nanoparticles embedded in N-doped hydrangea-like carbon as a sulfur host for high-performance lithium–sulfur batteries
Source: Royal Society of Chemistry journal article supplement (doi:10.1039/d0ra02102d), 2020-01-01
Supplement: d0ra02102d2.pdf [file d0ra02102d2.pdf]

## MoO<sub>2</sub> nanoparticles embedded in N-doped hydrangea-like carbon as sulfur host for high-performance lithium sulfur batteries

Yasai Wang<sup>a</sup>, Guilin Feng<sup>b</sup>, Yang Wang<sup>a</sup>, Zhenguo Wu<sup>a</sup>, Yanxiao Chen<sup>a\*</sup>, Xiaodong Guo<sup>a</sup>, Benhe Zhong<sup>a</sup>

<sup>a</sup> School of Chemical Engineering, Sichuan University, Chengdu 610065, P. R. China.

<sup>b</sup> RIES, Hokkaido University, N20W10, Kita-Ward, Sapporo 001-0020, Japan

Corresponding Authors:

Tel: +86-28-85406702; Fax: +86-28-85406702

E-mail address:

yxchen888@163.com

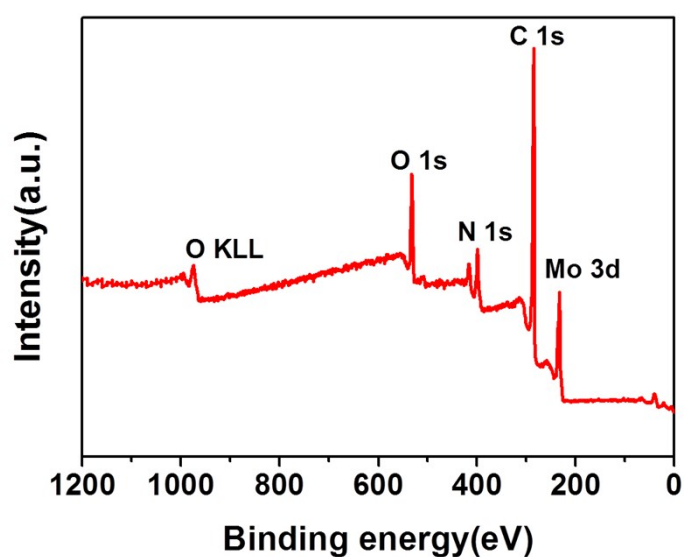

Fig.S1 XPS of MHC-2 composite

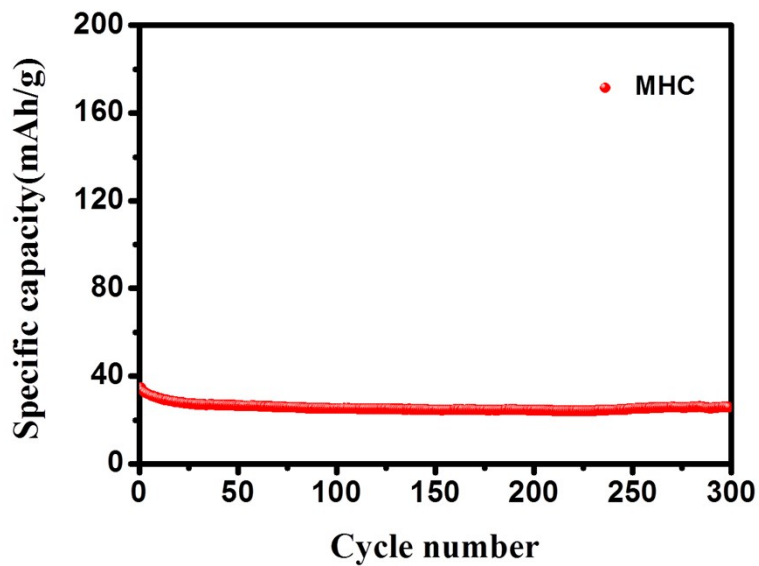

Fig.S2 specific capacity of MHC at  $1 \text{ A g}^{-1}$  for 300 cycles

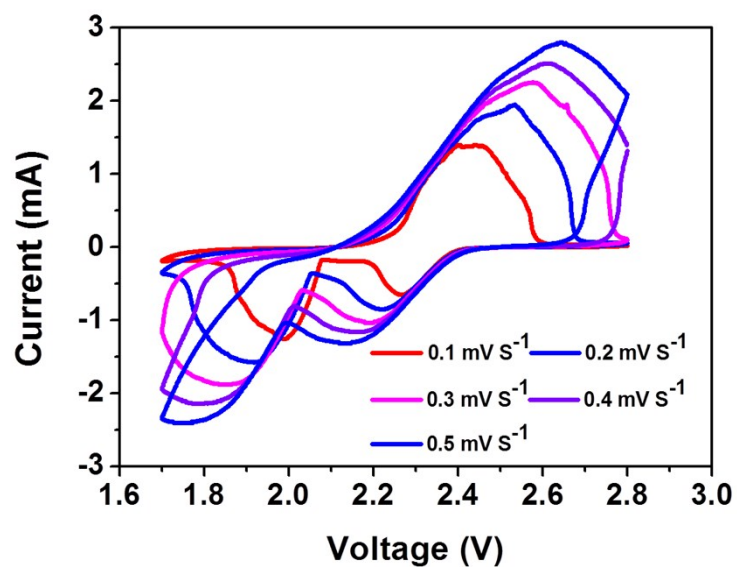

Fig.S3 CV curves of AB/S electrode from  $0.1$  to  $0.5 \text{ mV S}^{-1}$

Table S1 slope of the fitted line for the peak current at different scan rates

| Slope( $\text{mA/V s}^{-1}$ ) <sup>0.5</sup> | Peak a | Peak c <sub>1</sub> | Peak c <sub>2</sub> |
|----------------------------------------------|--------|---------------------|---------------------|
| MHC/S-2                                      | 182.43 | 105.33              | 148.34              |
| AB/S                                         | 111.14 | 53.05               | 93.16               |

Table S2 The chemical performance comparison of MHC with other matrixs repeorted in the literatures

| matrix                                    | Rate behavior                                 | cycle performance<br>(initial-final)                       | S content |
|-------------------------------------------|-----------------------------------------------|------------------------------------------------------------|-----------|
| $\alpha$ -MoO <sub>3</sub> <sup>[1]</sup> | 1151 mA h g <sup>-1</sup> 0.1C                | 684-649 mA h g <sup>-1</sup> 350 cycles 2C                 | 85%       |
| TiO <sub>2</sub> @TiN <sup>[2]</sup>      | 931 mA h g <sup>-1</sup> 0.1C                 | 823-525 mA h g <sup>-1</sup> 200 cycles 2C                 | 60%       |
| Mo <sub>2</sub> C@C <sup>[3]</sup>        | 1099 mA h g <sup>-1</sup> 0.1C                | 800-650 mA h g <sup>-1</sup> 300cycles 1C                  | 80%       |
| RuO <sub>2</sub> @NMCs <sup>[4]</sup>     | 1103 mA h g <sup>-1</sup> 0.2C                | 1065-934 mA h g <sup>-1</sup> 500 cycles 0.5C              | 70%       |
| MnO/MPC <sup>[5]</sup>                    | 900 mA h g <sup>-1</sup> 0.1A g <sup>-1</sup> | 723-515mAh g <sup>-1</sup> 150cycles 0.2 A g <sup>-1</sup> | 75%       |
| NiFeO <sub>4</sub> /C <sup>[6]</sup>      | 1041mA h g <sup>-1</sup> 0.2A g <sup>-1</sup> | -700 mA h g <sup>-1</sup> 500 cycles 0.5 A g <sup>-1</sup> | 70%       |
| MoO <sub>2</sub> /NC <sup>this work</sup> | 1057mA h g <sup>-1</sup> 0.2A g <sup>-1</sup> | 797-680mA h g <sup>-1</sup> 300cycles 1.0A g <sup>-1</sup> | 75%       |

- [1] P. Ji, B. Shang, Q. Peng, X. Hu, J. Wei,  $\alpha$ -MoO<sub>3</sub> spheres as effective polysulfides adsorbent for high sulfur content cathode in lithium-sulfur batteries, *Journal of Power Sources*, 2018, 400,572-579.
- [2] W. Xu, H.M. Pang, H.L. Zhou, Z.X. Jian, R.M. Hu, Y.L. Xing, S.C. Zhang, Lychee-like TiO<sub>2</sub>@TiN dual-function composite material for lithium-sulfur batteries, *Rsc Advances*, 2020,10, 2670-2676.
- [3] Z. Wang, X. Xu, Z. Liu, S. Ji, S.O. Ahmed Idris, J. Liu, Hollow spheres of Mo<sub>2</sub>C@C as synergistically confining sulfur host for superior Li-S battery cathode, *Electrochimica Acta*, 2020, 332, 135482.
- [4] R. Wang, K. Wang, S. Gao, M. Jiang, J. Han, M. Zhou, S. Cheng, K. Jiang, Electrocatalysis of polysulfide conversion by conductive RuO<sub>2</sub> nano dots for lithium-sulfur batteries, *Nanoscale*, 2018, 10, 16730-16737.
- [5] Y. Liu, G. Feng, X. Guo, Z. Wu, Y. Chen, W. Xiang, J. Li, B. Zhong, Employing MnO as multifunctional polysulfide reservoirs for enhanced-performance Li-S batteries, *Journal of Alloys and Compounds*, 2018, 748, 100-110.
- [6] H. Wang, N. Zhang, Y. Li, P. Zhang, Z. Chen, C. Zhang, X. Qiao, Y. Dai, Q. Wang, S. Liu, Unique Flexible NiFe<sub>2</sub>O<sub>4</sub>@S/rGO-CNT Electrode via the Synergistic Adsorption/Electrocatalysis Effect toward High-Performance Lithium-Sulfur Batteries, *The journal of physical chemistry letters*, 2019,10, 6518-6524.
